## Evidence for collapsin-1 functioning in the control of neural crest migration in both trunk and hindbrain regions

Britta J. Eickholt<sup>1</sup>, Sarah L. Mackenzie<sup>1</sup>, Anthony Graham<sup>1</sup>, Frank S. Walsh<sup>2</sup> and Patrick Doherty<sup>1,\*</sup>

<sup>1</sup>Molecular Neurobiology Group, GKT School of Medicine, King's College, London Bridge, London SE1 9RT, UK

<sup>2</sup>SmithKline Beecham Pharmaceuticals, New Frontiers Science Park, Third avenue, Harlow, Essex CM19 5AW, UK

\*Author for correspondence (e-mail: p.doherty@umds.ac.uk)

Accepted 25 February; published on WWW 19 April 1999

### SUMMARY

**Collapsin-1 belongs to the Semaphorin family of molecules, several members of which have been implicated in the co-ordination of axon growth and guidance. Collapsin-1 can function as a selective chemorepellent for sensory neurons, however, its early expression within the somites and the cranial neural tube (Shepherd, I., Luo, Y., Raper, J. A. and Chang, S. (1996) *Dev. Biol.* 173, 185-199) suggest that it might contribute to the control of additional developmental processes in the chick. We now report a detailed study on the expression of *collapsin-1* as well as on the distribution of collapsin-1-binding sites in regions where neural crest cell migration occurs. *collapsin-1* expression is detected in regions bordering neural crest migration pathways in both the trunk and hindbrain regions and a receptor for collapsin-1, neuropilin-1, is expressed by migrating crest**

**cells derived from both regions. When added to crest cells in vitro, a collapsin-1-Fc chimeric protein induces morphological changes similar to those seen in neuronal growth cones. In order to test the function of collapsin-1 on the migration of neural crest cells, an in vitro assay was used in which collapsin-1-Fc was immobilised in alternating stripes consisting of collapsin-Fc/fibronectin versus fibronectin alone. Explanted neural crest cells derived from both trunk and hindbrain regions avoided the collapsin-Fc-containing substratum. These results suggest that collapsin-1 signalling can contribute to the patterning of neural crest cell migration in the developing chick.**

Key words: Neural crest cell, Migration, Collapsin-1, Neuropilin-1, Chick

### INTRODUCTION

The migration of neural crest cells is a co-ordinated process controlled by various signals present in the immediate environment of the migratory route. Crest cells move along specific pathways that are highly segmented (Bronner-Fraser, 1993). In the trunk, crest cells emerging from the neural tube move selectively through the rostral half somite (Bronner-Fraser, 1986; Rickmann et al., 1985), allowing for the formation of the repeated pattern of paired dorsal root and sympathetic ganglia on either side of the neural tube in trunk regions (Goldstein and Kalcheim, 1991; Kalcheim and Teillet, 1989; Teillet et al., 1987). In addition, motor axons that exit the spinal cord extend into the periphery through the rostral half sclerotome (Keynes and Stern, 1984, 1988). This segmental pattern of crest migration and axon extension has been shown to be controlled by the intrinsic rostrocaudal polarity of the somites. Ablations of entire somites result in the disruption of the patterned outgrowth of motor axons (Tosney, 1988), and 180° rotations of the neural tube or presumptive somites result in both neural crest and motor axon migration through the caudal somite (originally the rostral somite) (Bronner-Fraser and Stern, 1991; Keynes and Stern, 1984). Moreover, motor axon outgrowth through somites consisting of multiple rostral halves is unsegmented

(Kalcheim and Teillet, 1989; Stern and Keynes, 1987). A number of molecules have been shown to be selectively expressed in the caudal somite, several of which exert dual activity, modulating both axonal outgrowth and neural crest migration. For example, chondroitin sulfate proteoglycan, collagen IX and peanut agglutinin (PNA)-binding molecules inhibit axonal growth and neural crest cell migration in vitro (Davies et al., 1990; Krull et al., 1995; Newgreen et al., 1986; Ring et al., 1996). Versican, a large aggregating proteoglycan, is selectively expressed in the regions that act as barriers to both neural crest cell migration and axon outgrowth (Landolt et al., 1995). Since versican inhibits cellular interactions with fibronectin (FN), laminin and collagen I, it is believed to function by inhibiting the migratory activity of these molecules. The restricted expression of transmembrane ligands of the Eph family of tyrosine kinases, ephrin-B1 in chick and ephrin-B2 in rat, to the caudal somite halves also points to a function in segmental patterning (Krull et al., 1997; Wang and Anderson, 1997). In vitro, ephrin-B2 can inhibit both crest migration and motor axon outgrowth (Wang and Anderson, 1997), and application of soluble ephrin-B1 molecules to whole chick trunk sections in vitro disrupts the metameric pattern of neural crest cell migration (Krull et al., 1997). Therefore, members of the Eph family appear to play a prominent role in the process of segmental patterning and

this role is evident in both trunk and hindbrain regions (Smith et al., 1997).

The dual activity of molecules in motor axon guidance and neural crest cell migration prompted us to examine the potential for collapsin-1 to function in the establishment of the segmented body. Collapsin-1 (Sema III/SemD) belongs to the Semaphorin family of proteins, members of which have been shown to function in the control of growth cones guidance (Mark et al., 1997). Collapsin-1/Sema III functions as a soluble molecule that can induce growth cone collapse (Luo et al., 1993) and neurons extending from a DRG explant placed in proximity to COS cells expressing collapsin-1/Sema III in a collagen gel avoid the collapsin-1 source (Messersmith et al., 1995; Shepherd et al., 1997). It has also been demonstrated that growth cones of spinal and several cranial motoneurons (MNs) are sensitive to collapsin-1 in vitro (Shepherd et al., 1996; Varela-Echavarría et al., 1997). Within the chick trunk, *collapsin-1/Sema III* is expressed in the dermamyotome and overlying ectoderm (Shepherd et al., 1996; Giger et al., 1996; Wright et al., 1995); tissues that have been shown to secrete a factor that repulsively guides DRG neurons in vitro (Keynes et al., 1997). Collapsin-1 is also selectively expressed in the caudal half of the somite in the rat (Giger et al., 1996; Wright et al., 1995).

In the present study, we report on the distribution of collapsin-1 receptors in chick embryos with respect to neural crest migration using a collapsin-Fc chimera as a receptor probe (Eickholt et al., 1997). We compared this with the expression of an established neuronal receptor for collapsin-1, neuropilin-1 (He and Tessier-Lavigne, 1997; Kolodkin et al., 1997). Our results demonstrate that migrating crest cells specifically bind collapsin-1 and express *neuropilin-1*. Furthermore, we show that the mRNA encoding collapsin-1 is highly expressed in regions that crest cells avoid. An established in vitro test system has been used to demonstrate that migrating crest cells are responsive to collapsin-1: when offered a choice between narrow stripes consisting of collapsin-Fc/FN (FN) versus FN alone, both hindbrain and trunk crest avoid the collapsin-Fc-coated substratum. Furthermore, we show that collapsin-1 induces rapid changes in the morphology of crest cells that is not unlike a neuronal growth cone collapse response. We conclude that collapsin-1 might contribute to the molecular mechanisms that determine the segmental pattern of both trunk and hindbrain crest cell migration, and identify neuropilin-1 as a candidate receptor that might mediate this response.

## MATERIALS AND METHODS

### Animals

Embryos from Rhode Island Red hens' eggs were obtained from a local flock (Needle farm, Enfield) and incubated at 37°C to required developmental stages according to Hamburger and Hamilton (1951).

### In situ hybridisation

The *collapsin-1* cDNA fragment was isolated as previously described (Eickholt et al., 1997) and subcloned into the Bluescript vector. The *Neuropilin-1* Bluescript vector was kindly provided by Professor Fujisawa. Antisense digoxigenin (DIG) riboprobes were synthesised by the incorporation of DIG-labelled UTP (Boehringer) from the linearised *collapsin-1* and *neuropilin-1* template using T3 and T7

RNA polymerase (Progema) respectively. Whole-mount in situ hybridisations were modified from Henrique et al. (1995). Embryos were fixed in 4% PFA and washed in PTW (PBS/0.1% Tween). Embryos were treated with 50% methanol/PTW and then with 100% methanol, before they were rehydrated through a series of 75%, 50%, 25% MeOH/PTW. After several washes with PTW, embryos were treated for 14 minutes with 10 µg/ml proteinase K/PTW and postfixed in 4% PFA/0.1% glutaraldehyde in PTW. Following several washes with PTW, embryos were rinsed in 1:1 PTW/hybridisation mix (50% Formamide, 1.3× SSC, 5 mM EDTA, 50 µg/ml yeast RNA, 0.2% Tween, 0.5% CHAPS, 100 µg/ml Heparin) and then with pure hybridisation mix, before the hybridisation mix containing 1 µg/ml DIG-labelled probe was added (overnight at 70°C). Embryos were washed with hybridisation mix and 1:1 hybridisation mix/MABT (100 mM maleic acid, 150 mM NaCl, 1% Tween, pH 7.5) at 70°C. Embryos were then rinsed and washed with MABT, before they were treated with MABT containing 2% Boehringer Blocking Reagent (Boehringer) and 20% goat serum for 1 hour. Anti-DIG-AP antibody (Boehringer, 1:2000 in blocking solution) was applied and embryos were incubated overnight at 4°C. After extensive washes in MABT the embryos were washed with NTMT (100 mM NaCl, 100 mM TrisHCl, 50 mM MgCl<sub>2</sub>, 1% Tween, pH 9.5). To activate the alkaline phosphates, NTMT containing NBT/BCIP (1:100, Boehringer) was added. When the colour had developed to the desired extent, the embryos were washed 3× with PTW. In situ hybridisations of cultured neural crest cells were performed the same way excluding the proteinase K treatment.

### Whole-mount immunohistochemistry

Embryos were collected in Howard's Ringer solution and before fixation in 4% PFA, forebrains were cut to prevent trapping of the antibody. Endogenous peroxidases were inactivated by incubating the embryos with 0.05% hydrogen peroxide in blocking buffer (PBS/1% Triton/2% BSA) overnight at 4°C. After several washes in blocking buffer, HNK-1 antibody was applied (Zymed, 1:100 in blocking buffer) and incubated for 1 day at 4°C with rocking. After extensive washes in blocking buffer, the secondary antibody was added (diluted in blocking buffer) and incubated overnight at 4°C. Embryos were then washed several times in PBS/1% Triton and preincubated for an hour with DAB developing buffer (0.5 mg/ml in 0.1 M Tris/HCl pH 7.4). The buffer was then replaced by an active DAB developing buffer containing 0.03% hydrogen peroxide. Embryos were developed until the colour had gained satisfactory intensity and vibratomed into 50 µm sections.

### Collapsin-1 Fc-chimeric proteins

Fc-chimeras of chick collapsin-1 (Sema III/SemD), containing essentially the full coding sequence (aa 1-748) were designed as previously described in Eickholt et al. (1997). Briefly, chick collapsin-1 cDNA was subcloned into the pIG 1 expression vector, which encodes the Fc-region of human IgG1 (Fawcett et al., 1994). Plasmid DNA was transiently transfected into COS-7 cells and the Fc-chimera was then purified from conditioned medium by protein-A Sepharose affinity chromatography.

### Binding distribution of collapsin-1-Fc in vitro and in situ

Cultured neural crest cells (see below) were washed with F12/10% FCS and incubated with collapsin-Fc at 10 µg/ml in F12/10% FCS for 60 minutes at RT. After four washes with F12, the cultures were fixed with 4% PFA and washed with blocking buffer (2% BSA, 0.1% Triton in PBS). Bound collapsin-Fc was detected using goat anti-Fc antibody (Sigma, 1:200), followed by a TRITC-conjugated anti-goat antibody (Sigma, 1:200). Cells were mounted in Mowiol (15% in glycerol/PBS) and examined by fluorescence microscopy.

For the localisation of collapsin-1-binding sites in situ, unfixed chick embryos were snap frozen in liquid nitrogen cooled isopentane. Serial sections (10 µm) were cut, air dried and fixed with 1%

PFA/PBS followed by a methanol treatment (20 minutes each at 4°C). Sections were blocked with 5% milk/0.1% Triton in PBS. Then collapsin-Fc (20 µg/ml) or human IgG (20 µg/ml) was applied and incubated for 1 hour at room temperature. After several washes, collapsin-Fc binding was detected as described above. Cell nuclei were visualised with Hoechst dye (1:10000 in PBS/0.1% Tween). Sections were mounted in Mowiol and examined by fluorescence microscopy.

### Neural crest explant cultures

Hindbrain and trunk regions were dissected out in Howard's Ringer solution, collected according to their somite stage (for the study of hindbrain and trunk crest, stage 10 and stages 12-13 chick embryos were used, respectively) and incubated for 5 minutes in dispase (1 mg/ml in L-15, Boehringer). Tissues were rinsed in L-15 medium and the mesenchyme and the notochord were removed. For trunk neural crest, pieces of neural tube extending from somite 4 to the 10th somite region were cut out (leaving some ectoderm attached to the neural tube). Alternatively, single rhombomeres were cut from the neural tube at the hindbrain level. The explants were placed on FN-coated chamber slides (10 µg/ml) and cultured for 20 hours in F12/SATO. In the collapse assay, human IgG or collapsin-Fc (both at 1 µg/ml) was added and cultures were incubated for 30 minutes before they were carefully fixed with 4% PFA/PBS. Cultures were stained with the HNK-1 antibody and phalloidin-TRITC (1.6 µM, Sigma). The cell area of individual cells was determined automatically with a standard image analysis program.

Neural tube explants were also placed onto coverslips, which had been coated with alternating substratum stripes as described in Vielmetter et al. (1990). Briefly, silicone matrices were sterilised and airdried, and airdried poly-L-lysine-mounted coverslips (20 µg/ml) were placed on the matrices and pressed on tightly. A mix of the purified collapsin-Fc (80 µg/ml) or control IgG (Pierce, 80 µg/ml) plus FN (1 µg/ml) in PBS was injected into the canals and incubated for 1 hour at 37°C. PBS was injected into the canals to remove unbound protein. Coverslips were then removed from the matrices, washed with PBS and incubated for 1 hour with FN (10 µg/ml). After 20 hours in F12/SATO, the explant cultures were fixed in 4% PFA. Neural tube explants cultured on striped substrata were examined using the HNK-1 antibody (Zymed, 1:100). The striped substratum pattern was visualised with a FITC-conjugated anti-human Fc- antibody (Sigma, 1:100). In addition, nuclear staining was performed (Hoechst, 1:10 000 for 5 minutes). After several washes in PBS, the explants were mounted in Mowiol and evaluated by fluorescence microscopy. In control experiments, the homogeneity of FN was tested using an anti-FN antibody (Sigma, 1:200), followed by Texas Red-conjugated secondary antibody (DAKO).

## RESULTS

### Neural crest migration correlates with *collapsin-1* expression

Neural crest cells arise from the dorsal region of the neural tube of vertebrate embryos and migrate in a segmented fashion at both trunk and hindbrain levels. In situ hybridisations of whole-mount embryos were performed using a *collapsin-1* probe in order to correlate its expression at specific developmental time points in relation to active neural crest migration.

Within the hindbrain *collapsin-1* expression follows the segmental ground plan into eight rhombomeres. Expression is conspicuous at stage 10 in rhombomere (r) 5 (not shown) that coincides with the pattern of neural crest cells emerging from

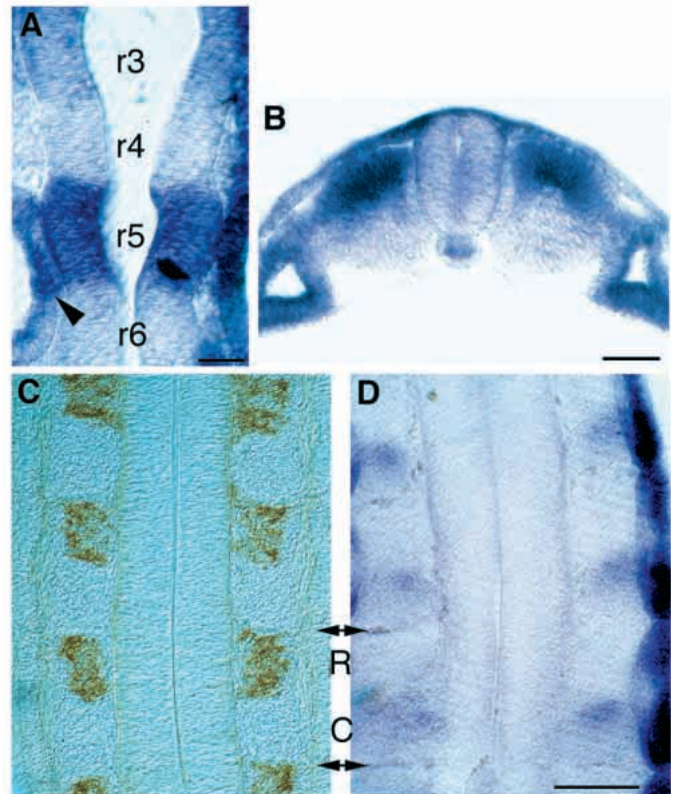

**Fig. 1.** *collaspin-1* expression pattern in hindbrain and trunk regions coincides with the migration of neural crest cells. (A) Coronal section through the hindbrain of a stage 12 whole-mount embryo probed with *collaspin-1*. Rostral is at the top. Expression is seen in rhombomere (r) 3 and r5, with particularly strong levels in r5. Within the otic vesicle *collaspin-1* signal is limited to the region laterally adjacent to r5 (arrowhead). (B) Cross sections through the trunk at stage 12 demonstrate strong expression within the dorsal and lateral portion of the immature somite. In addition, *collaspin-1* is strongly expressed within the dorsal ectoderm and lateral plate mesoderm. (C) Longitudinal section of a stage 18 embryo labelled with the HNK-1 antibody. Neural crest migration is limited to the rostral (R) half somite. (D) Longitudinal section taken from an embryo at stage 18 demonstrating that the *collaspin-1* mRNA is associated with the caudal (C) sclerotome and the dermatome with elevated levels of expression seen in the caudal half. Scale bars, 50 µm (A), 25 µm (B), 50 µm (D).

the neural tube (Lumsden et al., 1991; Noden, 1975). At stage 12, the *collaspin-1* transcript is localised in r1, r3 and r5 with weak expression in r1 and particularly strong expression in r5 (A). In addition, *collaspin-1* signal is detected within the otic vesicle with elevated levels seen in the region flanking r5 (Fig. 1A, arrowhead).

At the onset of neural crest migration within the trunk region, strong expression of *collaspin-1* mRNA is seen in the dorsal and lateral portion of the immature somite (Fig. 1B) with slightly elevated levels in the caudal somite in comparison to the rostral somite (not shown). In addition, the dorsal ectoderm and the lateral plate mesoderm show strong expression of *collaspin-1*. Neural crest cells that arise from the neural tube in the trunk initially migrate in a non-segmental fashion (Bronner-Fraser, 1986). Crest cells invading the sclerotome are

found in the rostral halves of the somites (Rickmann et al., 1985; Tucker et al., 1984; Vincent and Thiery, 1984; Vincent et al., 1983). Crest cells, visualised with the HNK-1 antibody, are exclusively seen in the rostral sclerotome, defining sharp borders between the rostral and caudal halves (Fig. 1C). The corresponding *collapsin-1* in situ pattern at stage 18 (Fig. 1D) reveals that expression is clearly associated with the caudal sclerotome, whereas expression is absent in the rostral sclerotome. Sagittal sections revealed that this restriction is also seen throughout the dorsoventral axis of the sclerotome (not shown). However, even in the most rostral somite, *collapsin-1* expression in the sclerotome is not established before stage 15. In addition, *collapsin-1* message is detected within the whole dermatome, and it appears that elevated levels of expression are present in each caudal half in comparison to the rostral half (Fig. 1D). At this stage, the neural tube does not express *collapsin-1*, which is consistent with recently reported *collapsin-1/Sema III* distributions (Giger et al., 1996; Shepherd et al., 1996; Wright et al., 1995).

### Collapsin-Fc binds to both hindbrain and trunk neural crest in situ and in vitro

We used an Fc-chimeric version of the collapsin-1 molecule to localise the expression of collapsin receptors within the developing hindbrain and the trunk of stage 12-18 chick embryos (Eickholt et al., 1997). At stage 12, receptors specifically recognised by the collapsin-Fc in the hindbrain region are associated with a stream of cells emerging from the neural tube, shown at the level of r2 in Fig. 2A. Staining with an HNK-1 antibody identifies this population as neural crest cells (Fig. 2C). Binding within the branchial region was seen in crest cells emerging from the different levels of the hindbrain and the different regions along their pathways (not shown). Control experiments with human IgG testify to the specificity of the collapsin-Fc binding (Eickholt et al., 1997). To test whether collapsin-Fc also recognises trunk crest, a second series of stainings were performed. At stage 18, the collapsin-Fc also binds to trunk neural crest (Fig. 2B). In contrast to the binding seen on hindbrain crest, the collapsin-Fc appears to bind more strongly to crest in close proximity to the neural tube relative to crest cells that have invaded the sclerotome. This might reflect a lack of sensitivity of the method since neural crest emerges from the hindbrain neural tube in streams of cells. Alternatively, trunk crest cells might downregulate putative collapsin-1-binding sites. Experiments on neural crest cells grown in vitro demonstrate that crest cells emerging both from a rhombomere explant (Fig. 3B) and from a trunk neural tube explant (Fig. 3D) bind the collapsin-Fc to a similar extent.

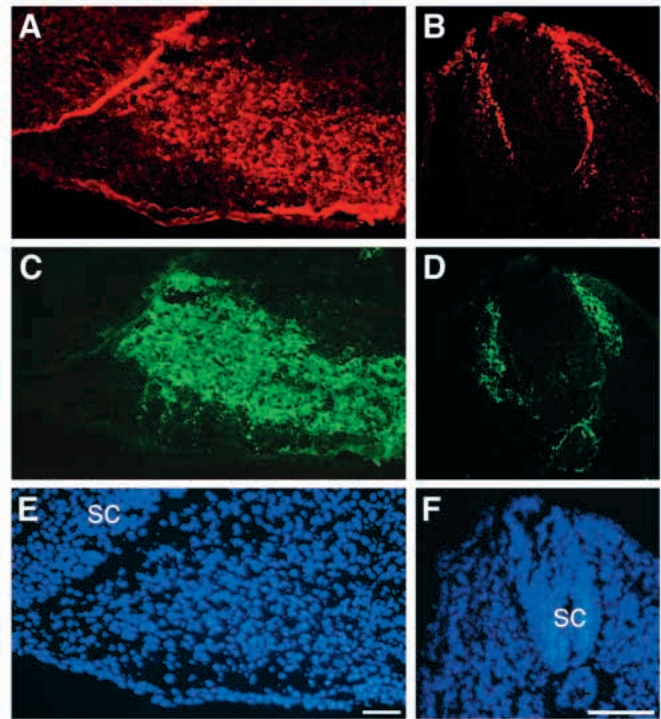

**Fig. 2.** Collapsin-Fc binds to both hindbrain and trunk crest cells in situ. Cross section through a stage 12 hindbrain at the level of r2 (A,C,E) and the trunk at stage 18 (B,D,F) were stained with collapsin-Fc (A,B) and HNK-1 (C,D). The basic morphology of the sections visualised with Hoechst nucleus dye is demonstrated in (E,F). Within the hindbrain, binding of the collapsin-Fc chimera correlates with migrating neural crest cells, whilst binding within trunk regions correlates with crest cells in close proximity to the spinal cord. sc, Spinal cord. Scale bars, 50  $\mu$ m (E), 50  $\mu$ m (F).

### Neuropilin-1 is expressed in migrating neural crest cells

Neuropilin-1 has recently been identified as a neuronal receptor, or an essential part of a neuronal receptor complex, for collapsin-1. Collapsin-1/Sema III binds with high affinity to neuropilin-1 (Feiner et al., 1997; He and Tessier-Lavigne, 1997; Kolodkin et al., 1997) and antibodies generated against the extracellular domains of neuropilin-1 can inhibit the biological activity of collapsin-1/Sema III (He and Tessier-Lavigne, 1997; Kolodkin et al., 1997). Within the hindbrain at stage 12, *neuropilin-1* expression is found at the level of r1/2, r4 and r6 just beneath the ectoderm (Fig. 4A,C) with no or only a weak signal detected adjacent to r3 and r5 (Fig. 4B).

**Fig. 3.** Collapsin-Fc binds to cultured neural crest cells. Neural tube explants derived from both hindbrain (A,B) and trunk regions (C,D) were cultured for 20 hours. (A,C) Neural crest cells, visualised with the HNK-1 antibody bind the collapsin-Fc (B,D). The two populations of crest cells show no obvious differences in the number of cells that bind the collapsin-Fc and/or the binding intensity. Scale bar, 50  $\mu$ m.

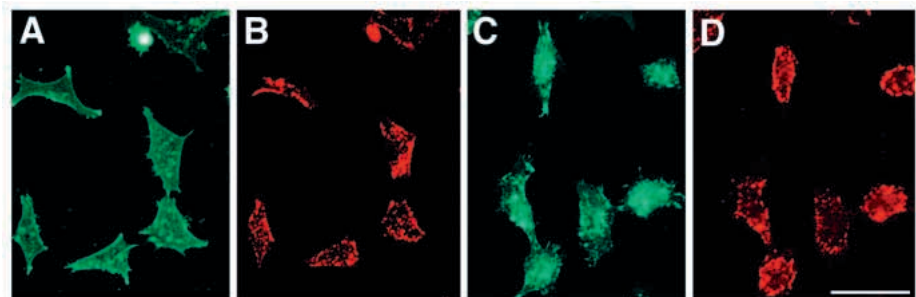

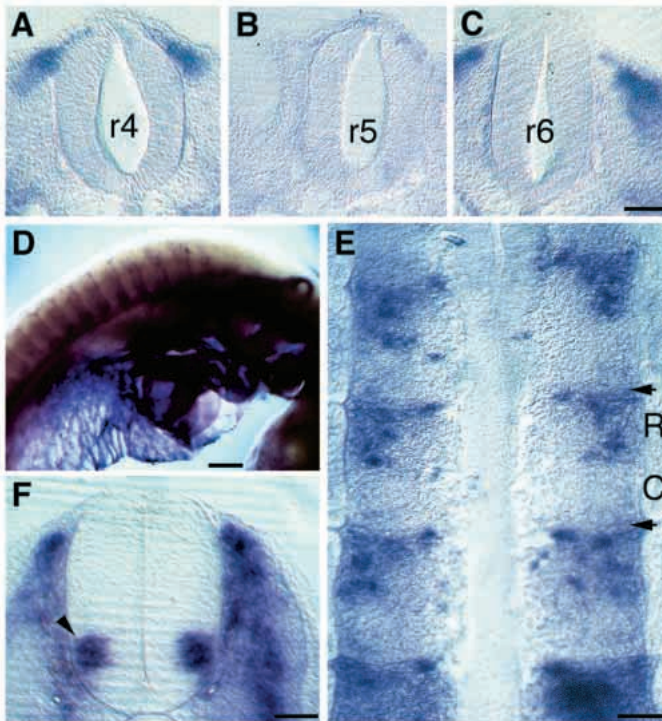

**Fig. 4.** *Neuropilin-1* is expressed in regions of active neural crest migration. (A-C) Transverse sections through rhombomere (r) 4-r6 of a stage 12 embryo probed with *neuropilin-1*. Expression is seen in regions corresponding to pathways taken by neural crest cells emerging from the neural tube. (D) Lateral view of a whole embryo at stage 15 with rostral at the right. *Neuropilin-1* expression is associated with the rostral half somites. (E) Longitudinal section of a whole-mount embryo at stage 18. *Neuropilin-1* signals are restricted to the rostral (R) somite halves. (F) Transverse section of a stage 18 embryo probed with *neuropilin-1* reveals strong expression within the sclerotome and the motorcolumn (arrowhead). No expression is seen in the dermatome. Scale bars; 50  $\mu$ m (C), 200  $\mu$ m (D), 50  $\mu$ m (E,F).

At this stage, no signal is detected within the neural tube. This restricted pattern of expression reflects the segmental pattern of late-migrating crest cells populating the branchial arches (Lumsden et al., 1991; Noden, 1975). The *neuropilin-1* transcript is not detected in the mesenchyme flanking the neural tube at the midbrain or more rostral levels (not shown).

Within the trunk, *neuropilin-1* expression is associated with regions of crest cells migrating through the rostral somite. This segmented expression pattern is clearly visible at stage 15 (Fig.

4D), whilst no expression was detected at stage 13. In longitudinal sections taken at stage 18, *neuropilin-1* mRNA is expressed strongly within the rostral sclerotome (Fig. 4E). *Neuropilin-1* expression in the motor column of the spinal cord (Fig. 4F) is consistent with previous studies (Takagi et al., 1995). In situ hybridisation was also used to confirm that HNK-1-positive populations of cultured crest cells express *neuropilin-1*. As a control, the same cell population was negative for *collapsin-1* expression (Fig. 5).

#### Collapsin-1-Fc exhibits repulsive activities towards neural crest migration

The restricted pattern of *collapsin-1* expression within the somite and the fact that neural crest cells express collapsin receptor(s) suggest that neural crest may be responsive to collapsin-1 in a manner that might contribute to the definition of the migratory pathways. Two different *in vitro* assays were employed to test the capability of collapsin-1 to affect neural crest cell migration. Firstly, the collapsin-1-Fc was added for 30 minutes directly to cultures of neural crest cells (Fig. 6), at a concentration that is sufficient to induce the collapse of DRG growth cones (1  $\mu$ g/ml, Eickholt et al., 1997). In comparison to control cultures that had been treated with 1  $\mu$ g/ml human IgG, collapsin-Fc cause both trunk and hindbrain crest cells to round up with the loss of their outspread lamellipodia. Crest cells contain dense bundles of actin filaments that are disrupted by the collapsin-Fc treatment (Fig. 6). Changes in cell morphology could be correlated with the changes in cell area that were measured automatically. As shown in Fig. 7, collapsin-1-Fc reduces significantly the cell area in both crest cells from trunk and hindbrain regions. In contrast, no alterations in cell morphology were observed when the collapsin-Fc was added to cultures of NIH 3T3 cells (Fig. 7). This demonstrates the cell-type specificity of the collapsin-1 effect.

In a second set of experiments, collapsin-Fc was immobilised in alternating stripes consisting of the Fc-chimeric protein plus FN versus FN alone using a silicon matrix (Vielmetter et al., 1990). Isolated rhombomeres from stage 10 embryos, and segments of neural tube from stage 12 embryos, were placed on this substratum and, after 20 hours, the cultures were fixed and migrating neural crest cells visualised using HNK-1. Collapsin-Fc was localised with antibodies that recognise the Fc-portion of the chimeric molecule. When offered the choice between collapsin-Fc plus FN versus FN alone neural crest cells exhibit a preference to migrate on FN stripe, avoiding the stripes containing collapsin-1-Fc (Fig. 8A, see Table 1). Hindbrain crest cells show a similar migratory behaviour with crest cells migrating on FN in preference to the collapsin-Fc/FN substratum (Fig. 8B). In a series of control

**Fig. 5.** *Neuropilin-1* is expressed in cultured neural crest cells. Cultures of neural crest cells from the trunk region were probed for *neuropilin-1* (A) and *collapsin-1* (B) expression. (C) An overlap of HNK-1 immunoreactivity with *neuropilin-1* expression characterises cells as neural crest. Scale bar, 25  $\mu$ m.

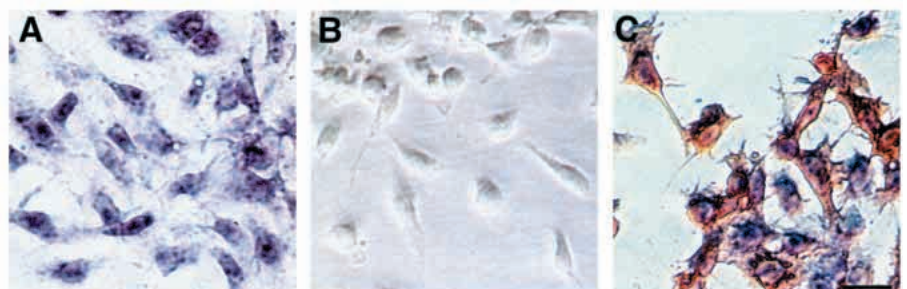

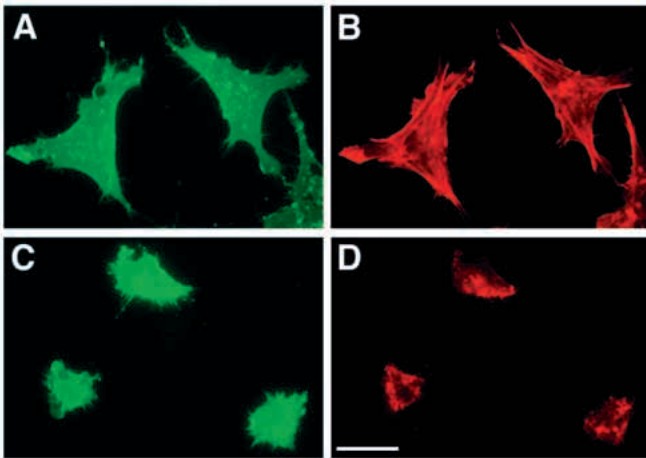

**Fig. 6.** Addition of collapsin-1 induces morphological changes in neural crest cells in vitro. Neural crest cells from the trunk region were cultured for 20 hours. Human IgG (A,B) or collapsin-1 Fc-chimera (both at 1  $\mu\text{g}/\text{ml}$ ) (C,D) was added for 30 minutes. Cultures were fixed and stained with HNK-1 (A,C) antibody and phalloidin (B,D). Treatment with the collapsin-1-Fc induces cell rounding that correlates with a disruption of the actin meshwork. Scale bar, 25  $\mu\text{m}$ .

experiments, neural crest were plated onto substrata consisting of alternating stripes of human IgG/FN versus FN alone. Both trunk and hindbrain neural crest showed no preference in their migratory behaviour on these substrata (Fig. 8C). We can also rule out the possibility that differences in FN coating result in migratory preferences since staining with an anti-FN antibody demonstrated a homogeneous coating of FN across the entire substratum (not shown).

In summary, these experiments suggest that the migratory preference of neural crest cells in the stripe assay is a specific result of the presence of collapsin-1 in the alternating stripes.

## DISCUSSION

On the basis of an established role in axonal guidance, we investigated the possibility that the secreted protein collapsin-1 might, in addition, influence the migration of neural crest cells. A detailed examination of the distribution of both *collapsin-1* and its known receptor, *neuropilin-1*, led us to test the effect of collapsin-1 on both the basic morphology of

**Table 1. Migratory behaviour of crest cells in the stripe assay**

|                 | Collapsin-Fc/FN versus FN<br>% total on FN stripes | IgG/FN versus FN<br>% total on FN stripes | <i>n</i> |
|-----------------|----------------------------------------------------|-------------------------------------------|----------|
| Trunk crest     | 73.6 ( $\pm 3.38$ )                                | 50.9 ( $\pm 1.8$ )                        | 10       |
| Hindbrain crest | 78.7 ( $\pm 0.6$ )                                 | 49 ( $\pm 1.95$ )                         | 4        |

Pieces of trunk neural tube or isolated rhombomeres were cultured on stripes consisting of collapsin-Fc/FN (fibronectin) versus FN. In control experiments, explants were cultured on human IgG/FN versus Fn. After 20 hours, cultures were fixed and stained with HNK-1 and anti-human Fc. In addition, nuclear staining was performed. HNK-1-positive cells were counted in distal regions of the explants according to the position of their nuclei. The results show the percentage of neural crest cells on pure FN as the means ( $\pm$ s.e.m.) calculated from the given number of independent experiments (*n*).

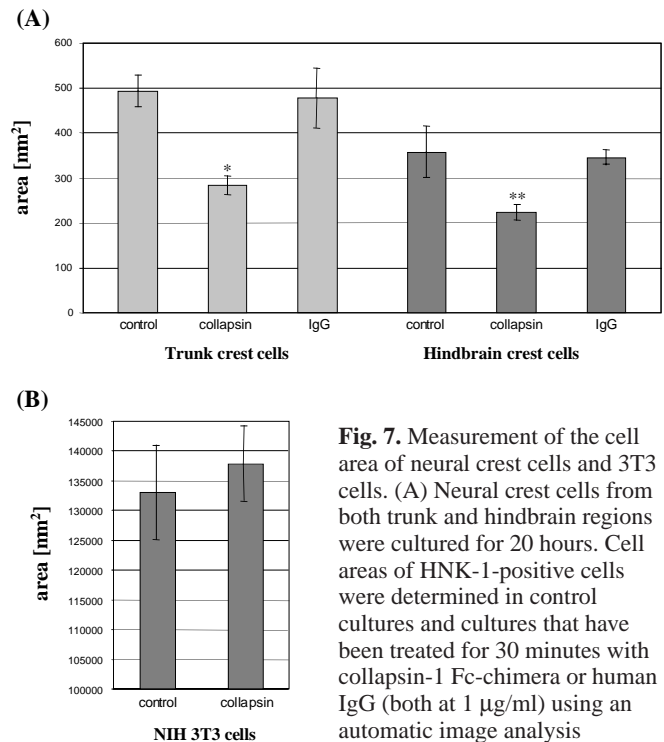

**Fig. 7.** Measurement of the cell area of neural crest cells and 3T3 cells. (A) Neural crest cells from both trunk and hindbrain regions were cultured for 20 hours. Cell areas of HNK-1-positive cells were determined in control cultures and cultures that have been treated for 30 minutes with collapsin-1 Fc-chimera or human IgG (both at 1  $\mu\text{g}/\text{ml}$ ) using an automatic image analysis program. In both crest populations, a significant decrease

in cell areas after collapsin-1-Fc addition was observed. (B) In contrast, NIH 3T3 cells do not respond to collapsin-1-Fc with any significant alterations in the cell area. Results show the mean value of the cell area pooled from 4 independent experiments, each value represents the mean  $\pm$  s.e.m. Individual values in each experiment were determined by measuring the area of 30-40 isolated cells. \* $P < 0.01$ ; \*\* $P < 0.05$ .

cultured crest cells and its ability to influence migration over a fibronectin substratum.

We have previously reported on the use of a collapsin-1 Fc-chimera for mapping the expression of collapsin-1 receptors in the developing chick (Eickholt et al., 1997). In the present study, we found that the collapsin-1 Fc-chimera protein binds specifically to neural crest cells migrating between the dermamyotome and the neural tube as well as to crest cells in the hindbrain region. A comparison with the pathways taken by migrating neural crest cells and the tissues that they avoid revealed a striking similarity. *Collapsin-1* expression is seen within the caudal sclerotome correlating with crest moving through the rostral sclerotome. The demonstration of *collapsin-1* expression in the caudal half of the sclerotome in the chick is consistent with the reported pattern of *collapsin-1/Sema III* expression in rat (Giger et al., 1996; Wright et al., 1995). In the developing chick, Shepherd et al. (1996) described expression in the dorsal and lateral region of the somite that is consistent with the pattern presented here. However, in contrast to this study, they report an absence of *collapsin-1* within the entire sclerotome. Confirmation that migrating crest cells express a receptor for collapsin-1 is provided by the observation that mRNA for neuropilin-1, which is an established receptor for collapsin-1 (He and Tessier-Lavigne, 1997; Kolodkin et al., 1997) is found in those regions occupied

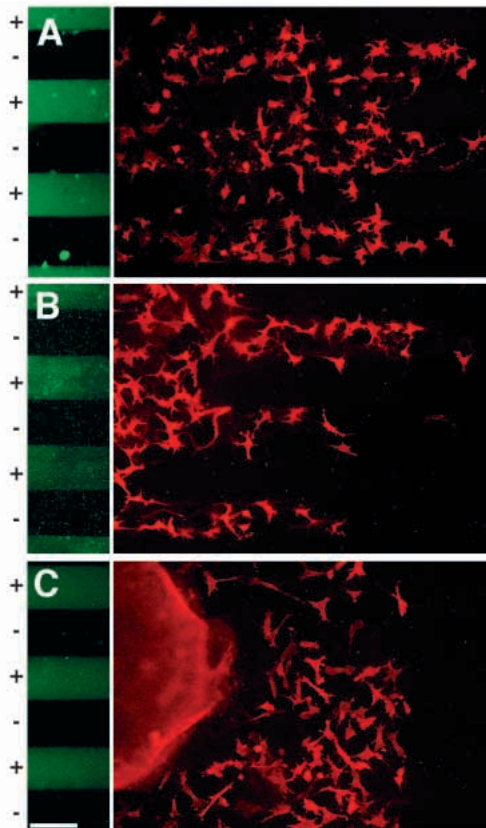

**Fig. 8.** Collapsin-1 inhibits neural crest cell migration in vitro. Neural tube explants derived from trunk (A) and hindbrain regions (B) were cultured on a substratum composed of alternating stripes of collapsin-Fc/fibronectin (+) versus fibronectin alone (-). After 1 day, cultures were fixed and stained with anti-Fc antibody (left) and HNK-1 antibody (right) to visualise the stripes containing collapsin-Fc and neural crest cells, respectively. Neural crest derived from both regions avoid stripes containing collapsin-Fc. (C) Control experiment showing a neural tube explant derived from the hindbrain that was cultured on a substratum composed of alternating stripes of human IgG/fibronectin (+) versus fibronectin (-) alone. Neural crest cells show no preference in their migratory pattern on the control substratum. Scale bar, 100  $\mu\text{m}$ .

by migratory crest cells and in crest cells in vitro. These complementary expression patterns, together with the established function of collapsin-1 as a repulsive axon guidance molecule, indicate that collapsin-1 might contribute to the guided migration of trunk crest cells through the rostral somite. Direct evidence that collapsin-1 has the potential to direct crest cell migration was obtained by employing two different in vitro test systems. In the collapse assay, addition of collapsin-Fc at low concentrations (1  $\mu\text{g}/\text{ml}$ ,  $\sim 4$  nM) induces rapid morphological changes in many crest cells that are similar to those seen in growth cones. Secondly, we cultured neural crest cells on substratum stripes consisting of collapsin-Fc/FN versus FN alone. Results of these experiments found a clear preference for cultured crest cells to avoid stripes containing collapsin-Fc. To our knowledge, this is the first clear example of non-neuronal cells responding to collapsin-1.

Recent experiments have focussed on ephrin-B1/receptor interactions controlling the restricted crest migration and MN

outgrowth pattern to the rostral somite. In rat, ephrin-B2 rather than ephrin-B1 is expressed in the caudal half of somites. Similarly to collapsin-1, ephrin-B2 induces in the stripe assay an avoidance reaction in cultured crest (Wang and Anderson, 1997), and its expression in the caudal somite prior to collapsin-1 indicates a dominant role in the initial establishment of the rostrocaudal pattern of crest cell migration. However, loss-of-function mutants for ephrin-B2 (Wang et al., 1998) and, furthermore, two putative receptors for ephrin-B2 develop no defects the metameric patterning of crest cell migration and/or MN outgrowth (Henkemeyer et al., 1996; Orioli et al., 1996; discussion Wang and Anderson, 1997). Likewise, disruptions of *collapsin-1* expression have also not resulted in any major defects within neural crest derivatives in the trunk (Behar et al., 1996; Taniguchi et al., 1997) and loss of *neuropilin-1* expression results merely in loose cell packing in the DRGs without any obvious alterations in their overall number and location (Kitsukawa et al., 1997). Therefore, numerous factors most probably operate to control the process of segmentation in a redundant manner, such that loss of a single molecule has little obvious impact on segmentation.

It is intriguing that *neuropilin-1* expression is found in migratory cells that populate both the sympathetic ganglia and DRGs, since both types of neurons, as well as the migrating crest cells, are responsive to collapsin-1 in vitro (Luo et al., 1993; Puschel et al., 1995; and this study). This observation indicates that common ligand/receptor interactions may contribute to the migration of neuroblast precursors and to the navigation of the axon of the same cells at a later stage in development. Thus, the mechanisms controlling the expression of neuropilin might be related to, or co-ordinated with, the mechanisms that establishes the ultimate phenotype of the crest cell.

Within the hindbrain, several studies have described the reduced number of neural crest cells from the ectoderm lateral to r3 and to the otic vesicle region lateral to r5 (D'Amico-Martel and Noden, 1983; Lumsden et al., 1991; Noden, 1975; Sechrist et al., 1993). Although crest production is reduced in r3 and r5 by an apoptotic mechanism (Graham et al., 1993, 1994), the segmental distribution is thought to result additionally from an active avoidance behaviour. Neural crest cells that originate in r3 fail to enter the adjacent mesenchyme and move along the rostrocaudal axis to merge with r2 and r4 crest (Birgbauer et al., 1995; Sechrist et al., 1993; Serbedzija et al., 1992). *Collapsin-1* is expressed at low levels in r3 and high levels in r5 and the flanking otic vesicle region. Collapsin-1, produced and released into the adjacent mesenchyme, might contribute to a chemorepulsive barrier between the streams of neural crest emerging from r2, r4 and r6 in close proximity to the neural tube.

## Conclusion

Evidence presented here indicates that collapsin-1 can be considered as a repulsive signal for neural crest migrating in both trunk and hindbrain regions. Collapsin-1-dependent mechanisms controlling growth cone guidance might therefore additionally operate to control the movement of cells. Based on knockout studies, it seems likely that collapsin-1 might operate in concert with a number of other molecules to control neural crest migration. It will be interesting to determine

whether the molecules currently being identified as important in the control of crest migration have unique roles to play. The generation of double knockout mice between collapsin-1 and ephrin-B2 should help to establish the level of redundancy in the control of neural crest migration.

We are indebted to Professor Fujisawa for providing the neuropilin-1 Bluescript vector. We thank Rachel Morrow for excellent technical assistance. This work was supported by the Medical Research Council, the Dunhill Trust and the Wellcome Trust.

## REFERENCES

- Behar, O., Golden, J. A., Mashimo, H., Schoen, F. J., and Fishman, M. C. (1996). Semaphorin III is needed for normal patterning and growth of nerves, bones and heart. *Nature* **383**, 525-528.
- Birgbauer, E., Sechrist, J., Bronner-Fraser, M. and Fraser, S. (1995). Rhombomeric origin and rostrocaudal reassignment of neural crest cells revealed by intravital microscopy. *Development* **121**, 935-945.
- Bronner-Fraser, M. (1993). Mechanisms of neural crest cell migration. *BioEssays* **15**, 221-230.
- Bronner-Fraser, M. and Stern, C. (1991). Effects of mesodermal tissues on avian neural crest cell migration. *Dev. Biol.* **143**, 213-217.
- Bronner-Fraser, M. (1986). Analysis of the early stages of trunk neural crest migration in avian embryos using monoclonal antibody HNK-1. *Dev. Biol.* **115**, 44-55.
- D'Amico-Martel, A. and Noden, D. (1983). Contributions of placodal and neural crest cells to avian cranial peripheral ganglia. *Am. J. Anat.* **166**, 445-468.
- Davies, J. A., Cook, G. M., Stern, C. D. and Keynes, R. J. (1990). Isolation from chick somites of a glycoprotein fraction that causes collapse of dorsal root ganglion growth cones. *Neuron* **4**, 11-20.
- Eickholt, B. J., Morrow, R., Walsh, F. S. and Doherty, P. (1997). Structural features of collapsin required for biological activity and distribution of binding sites in the developing chick. *Mol. Cell Neurosci.* **9**, 358-371.
- Fawcett, J., Holness, C. L. L. and Simmons, D. L. (1994). Molecular tools for the analysis of cell adhesion. *Cell Adhes. Com.* **2**, 275-285.
- Feiner, L., Koppel, A. M., Kobayashi, H. and Raper, J. A. (1997). Secreted chick semaphorins bind recombinant neuropilin with similar affinities but bind different subsets of neurons in situ. *Neuron* **19**, 539-545.
- Giger, R. J., Wolfer, D. P., De Wit, G. M. and Verhaagen, J. (1996). Anatomy of rat semaphorin III/collapsin-1 mRNA expression and relationship to developing nerve tracts during neuroembryogenesis. *J. Comp. Neurol.* **375**, 378-392.
- Goldstein, R. S. and Kalcheim, C. (1991). Normal segmentation and size of the primary sympathetic ganglia depend upon the alternation of rostrocaudal properties of the somites. *Development* **112**, 327-334.
- Graham, A., Francis-West, P., Brickell, P. and Lumsden, A. (1994). The signalling molecule BMP4 mediates apoptosis in the rhombencephalic neural crest. *Nature* **372**, 684-686.
- Graham, A., Heyman, I. and Lumsden, A. (1993). Even-numbered rhombomeres control the apoptotic elimination of neural crest from Odd-numbered rhombomeres in the chick hindbrain. *Development* **119**, 233-245.
- Hamburger, V. and Hamilton, H. (1951). A series of normal stages in the development of the chick embryo. *J. Morph.* **88**, 49-92.
- He, Z. and Tessier-Lavigne, M. (1997). Neuropilin is a receptor for the axonal chemorepellent Semaphorin III. *Cell* **90**, 739-751.
- Henkemeyer, M., Orioli, D., Henderson, J., Saxton, T., Roder, J., Pawson, T. and Klein, R. (1996). Nuk controls pathfinding of commissural axons in the mammalian central nervous system. *Cell* **86**, 35-46.
- Henrique, D., Adam, J., Myat, Chitnis, A., Lewis, J. and Ish-Horowitz, D. (1995). Expression of a Delta homologue in prospective neurons in the chick. *Nature* **375**, 787-790.
- Kalcheim, C. and Teillet, M. A. (1989). Consequences of somite manipulation on the pattern of dorsal root ganglion development. *Development* **106**, 85-93.
- Keynes, R., Tannahill, D., Morgenstern, D. A., Johnson, A. R., Cook, G. M. W. and Pini, A. (1997). Surround repulsion of spinal sensory axons in higher vertebrate embryos. *Neuron* **18**, 889-897.
- Keynes, R. J. and Stern, C. D. (1988). Mechanisms of vertebrate segmentation. *Development* **103**, 413-429.
- Keynes, R. J. and Stern, C. D. (1984). Segmentation in the vertebrate nervous system. *Nature* **310**, 786-789.
- Kitsukawa, T., Shimizu, M., Sanbo, M., Hirata, T., Taniguchi, M., Bekku, Y., Yagi, T. and Fujisawa, H. (1997). Neuropilin-semaphorin III/D-mediated chemorepulsive signals play a crucial role in peripheral nerve projection in mice. *Neuron* **19**, 995-1005.
- Kolodkin, A. L., Levengood, D. V., Rowe, E. G., Tai, Y.-T., Giger, R. J. and Ginty, D. D. (1997). Neuropilin is a semaphorin III receptor. *Cell* **90**, 753-762.
- Krull, C. E., Lansford, R., Gale, N. W., Collazo, A., Marcelle, C., Yancopoulos, G. D., Fraser, S. E. and Bronner-Fraser, M. (1997). Interactions of Eph-related receptors and ligands confer rostrocaudal pattern to trunk neural crest migration. *Curr. Biol.* **7**, 571-580.
- Krull, C. E., Collazo, A., Fraser, S. E. and Bronner-Fraser, M. (1995). Segmental migration of trunk neural crest: time-lapse analysis reveals a role for PNA-binding molecules. *Development* **121**, 3733-3743.
- Landolt, R. M., Vaughan, L., Winterhalter, K. H. and Zimmermann, D. R. (1995). Versican is selectively expressed in embryonic tissues that act as barriers to neural crest cell migration and axon outgrowth. *Development* **121**, 2303-2312.
- Lumsden, A., Sprawson, N. and Graham, A. (1991). Segmental origin and migration of neural crest cells in the hindbrain region of the chick embryo. *Development* **113**, 1281-1291.
- Luo, Y., Raible, D. and Raper, J. A. (1993). Collapsin: a protein in brain that induces the collapse and paralysis of neuronal growth cones. *Cell* **75**, 217-227.
- Mark, M. D., Lohrum, M. and Puschel, A. W. (1997). Patterning neuronal connections by chemorepulsion: the semaphorins. *Cell Tissue Res.* **290**, 299-306.
- Messersmith, E. K., Leonardo, E. D., Shatz, C. J., Tessier-Lavigne, M., Goodman, C. S. and Kolodkin, A. L. (1995). Semaphorin III can function as a selective chemorepellent to pattern sensory projections in the spinal cord. *Neuron* **14**, 949-959.
- Newgreen, D. F., Scheel, M. and Kastner, V. (1986). Morphogenesis of sclerotome and neural crest in avian embryos. In vivo and in vitro studies on the role of notochordal extracellular material. *Cell Tissue Res.* **244**, 299-313.
- Noden, D. M. (1975). An analysis of migratory behavior of avian cephalic neural crest cells. *Dev. Biol.* **42**, 106-130.
- Orioli, D., Henkemeyer, M., Lemke, G., Klein, R. and Pawson, T. (1996). Sek4 and Nuk receptors cooperate in guidance of commissural axons and in palate formation. *EMBO J.* **15**, 6035-6049.
- Puschel, A. W., Adams, R. H. and Betz, H. (1995). Murine semaphorin D/collapsin is a member of a diverse gene family and creates domains inhibitory for axonal extension. *Neuron* **14**, 941-948.
- Rickmann, M., Fawcett, J. W. and Keynes, R. J. (1985). The migration of neural crest cells and the growth of motor axons through the rostral half of the chick somite. *J. Embryol. Exp. Morphol.* **90**, 437-455.
- Ring, C., Hassell, J. and Halfter, W. (1996). Expression pattern of collagen IX and potential role in the segmentation of the peripheral nervous system. *Dev. Biol.* **180**, 41-53.
- Sechrist, J., Serbedzija, G. N., Scherson, T., Fraser, S. E. and Bronner-Fraser, M. (1993). Segmental migration of the hindbrain neural crest does not arise from its segmental generation. *Development* **118**, 691-703.
- Serbedzija, G. N., Bronner-Fraser, M. and Fraser, S. E. (1992). Vital dye analysis of cranial neural crest cell migration in the mouse embryo. *Development* **116**, 297-307.
- Shepherd, I. T., Luo, Y., Lefcort, F., Reichardt, L. F. and Raper, J. A. (1997). A sensory axon repellent secreted from ventral spinal cord explants is neutralized by antibodies raised against collapsin-1. *Development* **124**, 1377-1385.
- Shepherd, I., Luo, Y., Raper, J. A. and Chang, S. (1996). The distribution of collapsin-1 mRNA in the developing chick nervous system. *Dev. Biol.* **173**, 185-199.
- Smith, A., Robinson, V., Patel, K. and Wilkinson, D. G. (1997). The EphA4 and EphB1 receptor tyrosine kinases and ephrin-B2 ligand regulate targeted migration of branchial neural crest cells. *Curr. Biol.* **7**, 561-570.
- Stern, C. D. and Keynes, R. J. (1987). Interactions between somite cells: the formation and maintenance of segment boundaries in the chick embryo. *Development* **99**, 261-272.
- Takagi, S., Kasuya, Y., Shimizu, M., Matsuura, T., Tsuboi, M., Kawakami, A. and Fujisawa, H. (1995). Expression of a cell adhesion molecule, neuropilin, in the developing chick nervous system. *Dev. Biol.* **170**, 207-222.



- Taniguchi, M., Yuasa, S., Fujisawa, H., Naruse, I., Saga, S., Mishina, M. and Yagi, Y.** (1997). Disruption of semaphorin III/D gene causes severe abnormality in peripheral nerve projection. *Neuron* **19**, 519-530.
- Teillet, M. A., Kalcheim, C. and Le Douarin, N. M.** (1987). Formation of the dorsal root ganglia in the avian embryo: segmental origin and migratory behavior of neural crest progenitor cells. *Dev. Biol.* **120**, 329-347.
- Tosney, K.** (1988). Proximal tissues and patterned neurite outgrowth at the lumbosacral level of the chick embryo: partial and complete deletion of the somite. *Dev. Biol.* **127**, 266-286.
- Tucker, G., Aoyama, H., Lipinski, M., Tursz, T. and Thiery, J.** (1984). Identical reactivity of monoclonal antibodies HNK-1 and NC-1: conservation in vertebrates on cells derived from the neural primordium and on some leukocytes. *Cell Differ.* **14**, 223-230.
- Varela-Echavarria, A., Tucker, A., Puschel, A. W. and Guthrie, S.** (1997). Motor axon subpopulations respond differentially to the chemorepellents netrin-1 and semaphorin D. *Neuron* **18**, 193-207.
- Vielmetter, J., Stolze, B., Bonhoeffer, F. and Stuermer, C.** (1990). In vitro assay to test differential substrate affinities of growing axons and migratory cells. *Exp. Brain Res.* **81**, 283-287.
- Vincent, M. and Thiery, J.** (1984). A cell surface marker for neural crest and placodal cells: further evolution in peripheral and central nervous system. *Dev. Biol.* **103**, 468-481.
- Vincent, M., Duband, J. and Thiery, J.** (1983). A cell surface determinant expressed early on migrating avian neural crest cells. *Brain Res.* **285**, 235-238.
- Wang, H., Chen, Z. and Anderson, D.** (1998). Molecular distinction and angiogenic interaction between embryonic. *Cell* **93**, 741-753.
- Wang, H. U. and Anderson, D. J.** (1997). Eph family transmembrane ligands can mediate repulsive guidance of trunk neural crest migration and motor axon outgrowth. *Neuron* **18**, 383-396.
- Wright, D. E., White, F. A., Gerfen, R. W., Silos-Santiago, I. and Snider, W. D.** (1995). The guidance molecule semaphorin III is expressed in regions of spinal cord and periphery avoided by growing sensory axons. *J. Comp. Neurol.* **361**, 321-333.
